# Supplementary material for: Light controlled assembling of iodine-free dye-sensitized solar cells with poly(3,4-ethylenedioxythiophene) as a hole conductor reaching 7.1% efficiency
Source: Royal Society of Chemistry journal article supplement (doi:10.1039/c2cp40882a), 2012-01-01
Supplement: c2cp40882a.pdf [file c2cp40882a.pdf]

### Supporting Information

#### Light Controlled Assembling of Iodine-Free Dye-Sensitized Solar Cells with Poly(3,4-ethylenedioxythiophene) as Hole Conductor

Xizhe Liu, Yueming Cheng, Long Wang, Liping Cai, Bin Liu\*

Department of Chemical and Biomolecular Engineering, National University of Singapore, 4 Engineering Drive 4, Singapore 117576 (Singapore), E-mail: cheliub@nus.edu.sg

Fig. S1 and Table S1 show the reproducibility of D205 dye-sensitized solar cells with PEDOT as hole conductor. The PEDOT was prepared by the photoelectrochemical polymerization method under 670 nm illumination in porous TiO<sub>2</sub> electrodes.

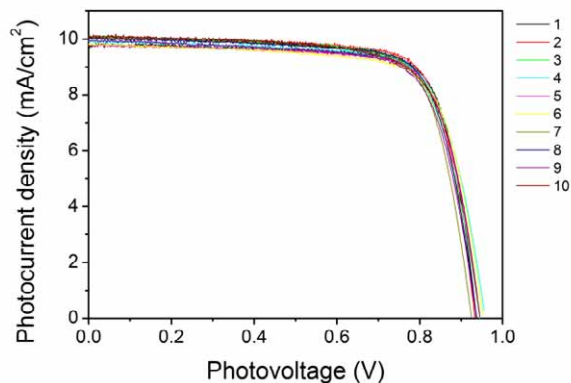

**Fig. S1** the I-V curves of ten PEDOT DSSCs fabricated under the optimized 670 nm illumination. The I-V measurements were performed under 100mW/cm<sup>2</sup> AM1.5 illumination.

**Table S1.** The photoelectrical performance of ten PEDOT DSSCs fabricated under the optimized 670 nm illumination.  $J_{SC}$  is short circuit photocurrent density,  $V_{OC}$  is open circuit photovoltage,  $FF$  is fillfactor,  $PCE$  is solar-to-electric conversion efficiency.

|    | $J_{SC}$<br>(mA/cm <sup>2</sup> ) | $V_{OC}$<br>(mV) | $FF$ | $PCE$<br>(%) |
|----|-----------------------------------|------------------|------|--------------|
| 1  | 9.8                               | 937              | 0.77 | 7.11         |
| 2  | 10.1                              | 929              | 0.76 | 7.15         |
| 3  | 10.1                              | 944              | 0.74 | 7.01         |
| 4  | 9.9                               | 955              | 0.74 | 7.03         |
| 5  | 9.8                               | 945              | 0.75 | 6.96         |
| 6  | 9.8                               | 952              | 0.74 | 6.91         |
| 7  | 10.1                              | 925              | 0.75 | 6.98         |
| 8  | 10.0                              | 938              | 0.75 | 7.07         |
| 9  | 10.0                              | 936              | 0.73 | 6.87         |
| 10 | 10.1                              | 944              | 0.73 | 6.92         |
